# Supplementary material
Source: PubMed Central journal article supplement (PMC7231968)
Supplement: NIHMS1579428-supplement-1.pdf [file NIHMS1579428-supplement-1.pdf]

Table S1.

| Frequency         | Region              | Comparison          | (t)   | Significance (p) |
|-------------------|---------------------|---------------------|-------|------------------|
| $\beta$           | <i>r-M1*</i>        | Flanker vs. control | -3.96 | <.001            |
|                   |                     | Simon vs. control   | -3.81 | <.001            |
|                   |                     | MS vs. control      | -4.46 | <.001            |
|                   |                     | Flanker vs. Simon   | -0.70 | .490             |
|                   |                     | MS vs. Flanker      | -0.64 | .526             |
|                   |                     | MS vs. Simon        | -1.27 | .216             |
|                   | <i>r-PPC*</i>       | Flanker vs. control | -4.27 | <.001            |
|                   |                     | Simon vs. control   | -3.35 | .003             |
|                   |                     | MS vs. control      | -5.97 | <.001            |
|                   |                     | Flanker vs. Simon   | -0.73 | .473             |
|                   |                     | MS vs. Flanker      | -1.24 | .228             |
|                   |                     | MS vs. Simon        | -1.57 | .130             |
|                   | <i>l-M1</i>         | Flanker vs. control | -4.19 | <.001            |
|                   |                     | Simon vs. control   | -1.68 | .107             |
|                   |                     | MS vs. control      | -3.52 | .002             |
|                   |                     | Flanker vs. Simon   | -1.13 | .270             |
|                   |                     | MS vs. Flanker      | -0.11 | .914             |
|                   |                     | MS vs. Simon        | -1.20 | .242             |
|                   | <i>l-PPC*</i>       | Flanker vs. control | -5.85 | <.001            |
|                   |                     | Simon vs. control   | -2.49 | .021             |
|                   |                     | MS vs. control      | -4.46 | <.001            |
|                   |                     | Flanker vs. Simon   | -0.72 | .481             |
|                   |                     | MS vs. Flanker      | -0.20 | .843             |
|                   |                     | MS vs. Simon        | 0.64  | .528             |
|                   | <i>r-DLPFC*</i>     | Flanker vs. control | -3.53 | .002             |
|                   |                     | Simon vs. control   | -2.83 | .010             |
|                   |                     | MS vs. control      | -0.54 | .594             |
|                   |                     | Flanker vs. Simon   | 1.21  | .240             |
|                   |                     | MS vs. Flanker      | 2.96  | .007             |
|                   |                     | MS vs. Simon        | 2.73  | .012             |
|                   | <i>r-Cer</i>        | Flanker vs. control | -3.50 | .002             |
|                   |                     | Simon vs. control   | -1.52 | .143             |
|                   |                     | MS vs. control      | 0.02  | .988             |
| Flanker vs. Simon |                     | -2.72               | .013  |                  |
| MS vs. Flanker    |                     | 3.69                | .001  |                  |
| MS vs. Simon      |                     | 1.55                | .136  |                  |
| <i>l-SMG</i>      | Flanker vs. control | -1.74               | .096  |                  |
|                   | Simon vs. control   | -2.67               | .014  |                  |
|                   | MS vs. control      | -4.16               | <.001 |                  |
|                   | Flanker vs. Simon   | 0.85                | .407  |                  |
|                   | MS vs. Flanker      | -2.23               | .036  |                  |
|                   | MS vs. Simon        | -1.03               | .312  |                  |
| $\gamma$          | <i>r-PPC</i>        | Flanker vs. control | -0.64 | .528             |
|                   |                     | Simon vs. control   | -1.27 | .218             |
|                   |                     | MS vs. control      | 1.31  | .204             |
|                   |                     | Flanker vs. Simon   | 0.66  | .518             |
|                   |                     | MS vs. Flanker      | 1.92  | .068             |
|                   |                     | MS vs. Simon        | 2.47  | .022             |

M1: primary motor cortex, PPC: posterior parietal cortex, DLPFC: dorsolateral prefrontal cortex, Cer: cerebellum, SMG: supramarginal gyrus. \*Significant after cluster-based permutation testing (initial  $p = .01$ , 10,000 permutations).

**Table S2.**

| <b>Frequency</b> | <b>Region</b> | <b>Comparison</b> | <b>BF<sub>01</sub></b>  | <b>Error (%)</b>        |
|------------------|---------------|-------------------|-------------------------|-------------------------|
| <b>β</b>         | <i>l-M1</i>   | RM-ANOVA          | 3.54                    | 2.31                    |
|                  |               | Flanker vs. Simon | 2.59                    | 2.05 x 10 <sup>-4</sup> |
|                  |               | MS vs. Flanker    | 4.55                    | 3.30 x 10 <sup>-2</sup> |
|                  |               | MS vs. Simon      | 2.41                    | 2.03 x 10 <sup>-4</sup> |
|                  | <i>l-PPC</i>  | RM-ANOVA          | 6.24                    | 5.86 x 10 <sup>-1</sup> |
|                  |               | Flanker vs. Simon | 3.63                    | 3.50 x 10 <sup>-2</sup> |
|                  |               | MS vs. Flanker    | 4.49                    | 3.30 x 10 <sup>-2</sup> |
|                  |               | MS vs. Simon      | 3.80                    | 3.50 x 10 <sup>-2</sup> |
|                  | <i>r-M1</i>   | RM-ANOVA          | 4.38                    | 6.28 x 10 <sup>-1</sup> |
|                  |               | Flanker vs. Simon | 3.66                    | 3.50 x 10 <sup>-2</sup> |
|                  |               | MS vs. Flanker    | 3.79                    | 3.50 x 10 <sup>-2</sup> |
|                  |               | MS vs. Simon      | 2.23                    | 2.01 x 10 <sup>-4</sup> |
|                  | <i>r-PPC</i>  | RM-ANOVA          | 2.34                    | 6.55 x 10 <sup>-1</sup> |
|                  |               | Flanker vs. Simon | 3.60                    | 3.50 x 10 <sup>-2</sup> |
|                  |               | MS vs. Flanker    | 2.32                    | 2.02 x 10 <sup>-4</sup> |
| MS vs. Simon     |               | 1.56              | 1.90 x 10 <sup>-4</sup> |                         |

M1: primary motor cortex, PPC: posterior parietal cortex.
